# Supplementary material
Source: PubMed Central journal article supplement (PMC4318762)
Supplement: NIHMS651825-supplement-1.pdf [file NIHMS651825-supplement-1.pdf]

## **Supplemental Information Inventory**

1. Supplemental Data
  - A. Figure S1, related to Figure 1
  - B. Figure S2, related to Figure 2
  - C. Figure S3, related to Figure 2
  - D. Figure S4, related to Figure 1 and Discussion
  - E. Table S1, related to Figure 1
  - F. Table S2, related to Figure 2
  - G. Table S3, related to Figure 2
2. Supplemental Experimental Procedures
3. Supplemental References
